# Supplementary material
Source: publisher figshare collection journal article supplement (https://gsajournals.figshare.com/articles/dataset/_/7121264)
Supplement: Supplementary file 1 [file 1]

FIG S2

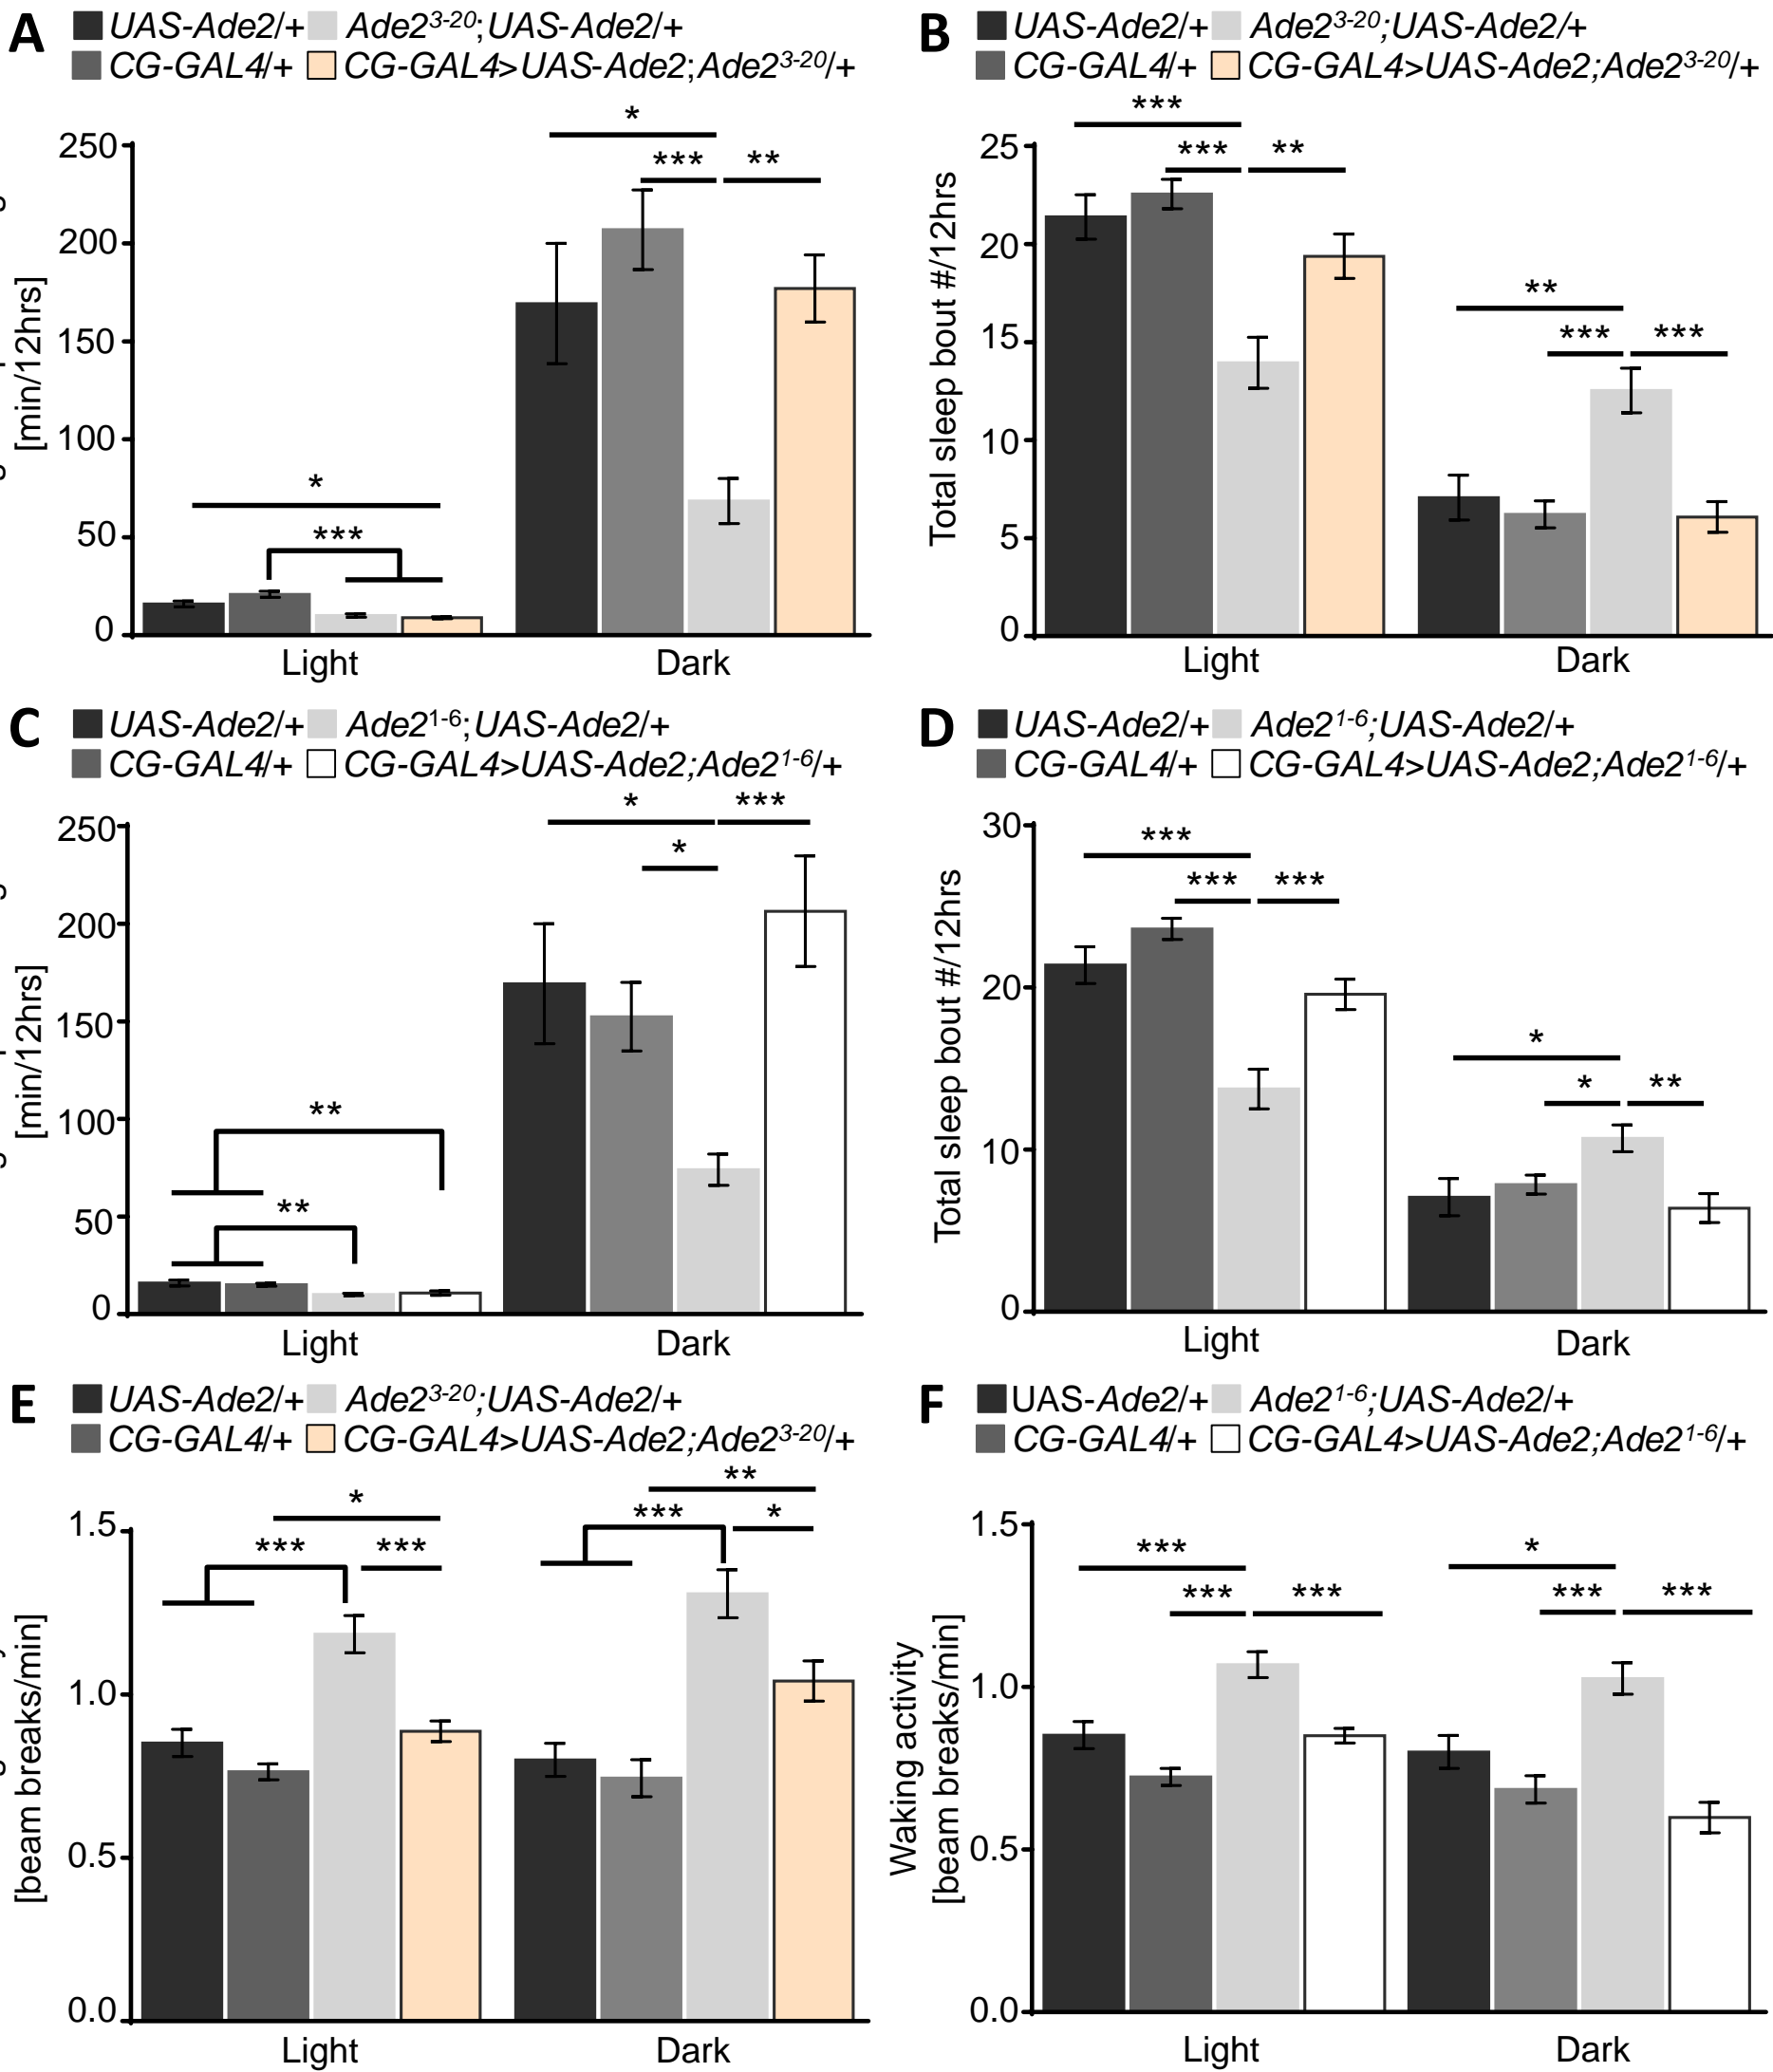

**Figure S2. *Ade2* expression in the fat body partially rescues sleep loss**

(A) Fat body rescue of *Ade2*<sup>3-20</sup> (*CG-GAL4*>*Ade2*<sup>3-20</sup>; *UAS-Ade2*/+; pale orange; n=50) restores increase in average bout length during the nighttime (dark) compared to *Ade2*<sup>3-20</sup> mutant controls (*Ade2*<sup>3-20</sup>; *UAS-Ade2*/+; grey; n=34,  $p=0.008$ ), but not during daytime. Daytime average sleep bout length is significantly different between rescue and *CG-GAL4*/+ (dark grey; n=83,  $p<0.0001$ ) or *UAS-Ade2*/+ (black; n=31,  $p=0.017$ ) controls. Night average sleep bout length is reduced in *Ade2*<sup>3-20</sup>; *UAS-Ade2*/+ compared to control flies *CG-GAL4*/+ ( $p<0.0001$ ) or *UAS-Ade2*/+ ( $p=0.036$ ). One-way ANOVA, Light,  $F(3, 194)=17.76$ ; Dark,  $F(3, 184)=6.865$ . (B) *Ade2*<sup>3-20</sup> rescues total sleep bout during the light ( $p=0.004$ ) and dark ( $p<0.0001$ ) compared to *Ade2*<sup>3-20</sup>; *UAS-Ade2*/+ mutants. Daytime total sleep bout differ significantly between *Ade2*<sup>3-20</sup>; *UAS-Ade2*/+ mutants and control *UAS-Ade2*/+ and *CG-GAL4*/+ during light ( $p<0.0001$ ) and dark ( $p<0.0001$ ). One-way ANOVA, Light,  $F(3, 194)=12.08$ ; Dark,  $F(3, 195)=9.68$ . (C) During nighttime (dark), *Ade2*<sup>1-6</sup> rescue (white, n=43) restores increase in average sleep bout length compared to *Ade2*<sup>1-6</sup> mutant controls (*Ade2*<sup>1-6</sup>; *UAS-Ade2*/+; grey; n=39), but not during daytime. Daytime sleep bout length is significantly different between *UAS-Ade2*/+ (black, n=31,  $p=0.0066$ ) and *CG-GAL4*/+ (dark grey, n=78,  $p=0.0040$ ) and *Ade2*<sup>3-20</sup> rescue. One-way ANOVA, Light,  $F(3, 187)=8.98$ ; Dark,  $F(3, 188)=5.412$ . (D) Total sleep bout is restored in *Ade2*<sup>1-6</sup> rescue flies during light ( $p=0.0003$ ) and dark ( $p=0.003$ ) compared to *Ade2*<sup>1-6</sup>; *UAS-Ade2*/+ mutant controls. Daytime total sleep bout is significantly reduced between *UAS-Ade2*/+ and *CG-GAL4*/+ controls ( $p<0.0001$ ) compared to *Ade2*<sup>1-6</sup> mutant controls, while nighttime sleep bout is increased in *Ade2*<sup>1-6</sup> mutant compared to controls ( $p=0.95$ ). One-way ANOVA, Light,  $F(3, 187)=21.41$ ; Dark,  $F(3, 184)=4.50$ . (E) Fat body rescue of *Ade2*<sup>3-20</sup> restores waking activity during daytime ( $p<0.0001$ ) and nighttime ( $p=0.044$ ) compared to *Ade2*<sup>3-20</sup>; *UAS-Ade2*/+ mutant controls. Waking activity is significantly increased during light ( $p<0.0001$ ) and dark ( $p<0.0001$ ) in *Ade2*<sup>3-20</sup> mutant compared to *UAS-Ade2*/+ and *CG-GAL4*/+ controls. One-way ANOVA, Light,  $F(3, 194)=23.79$ ; Dark,  $F(3, 196)=14.34$ . (F) Waking activity is rescued in *CG-GAL4*>*Ade2*<sup>1-6</sup>; *UAS-Ade2*/+ during daytime ( $p<0.0001$ ) and nighttime ( $p<0.0001$ ) compared to *Ade2*<sup>1-6</sup>; *UAS-Ade2*/+ mutant controls. *Ade2*<sup>1-6</sup> mutant control have increased waking activity during light ( $p<0.0001$ ) and dark ( $p=0.02$ ) compared to control flies. One-way ANOVA, Light,  $F(3, 187)=21.47$ ; Dark,  $F(3, 188)=13.23$ . All columns are mean  $\pm$  SEM; \* $p<0.05$ ; \*\* $p<0.01$ ; \*\*\* $p<0.001$ .
