# Supplementary material
Source: publisher figshare collection journal article supplement (https://gsajournals.figshare.com/articles/dataset/_/7121264)
Supplement: Supplementary file 2 [file 1]

**FIG S1**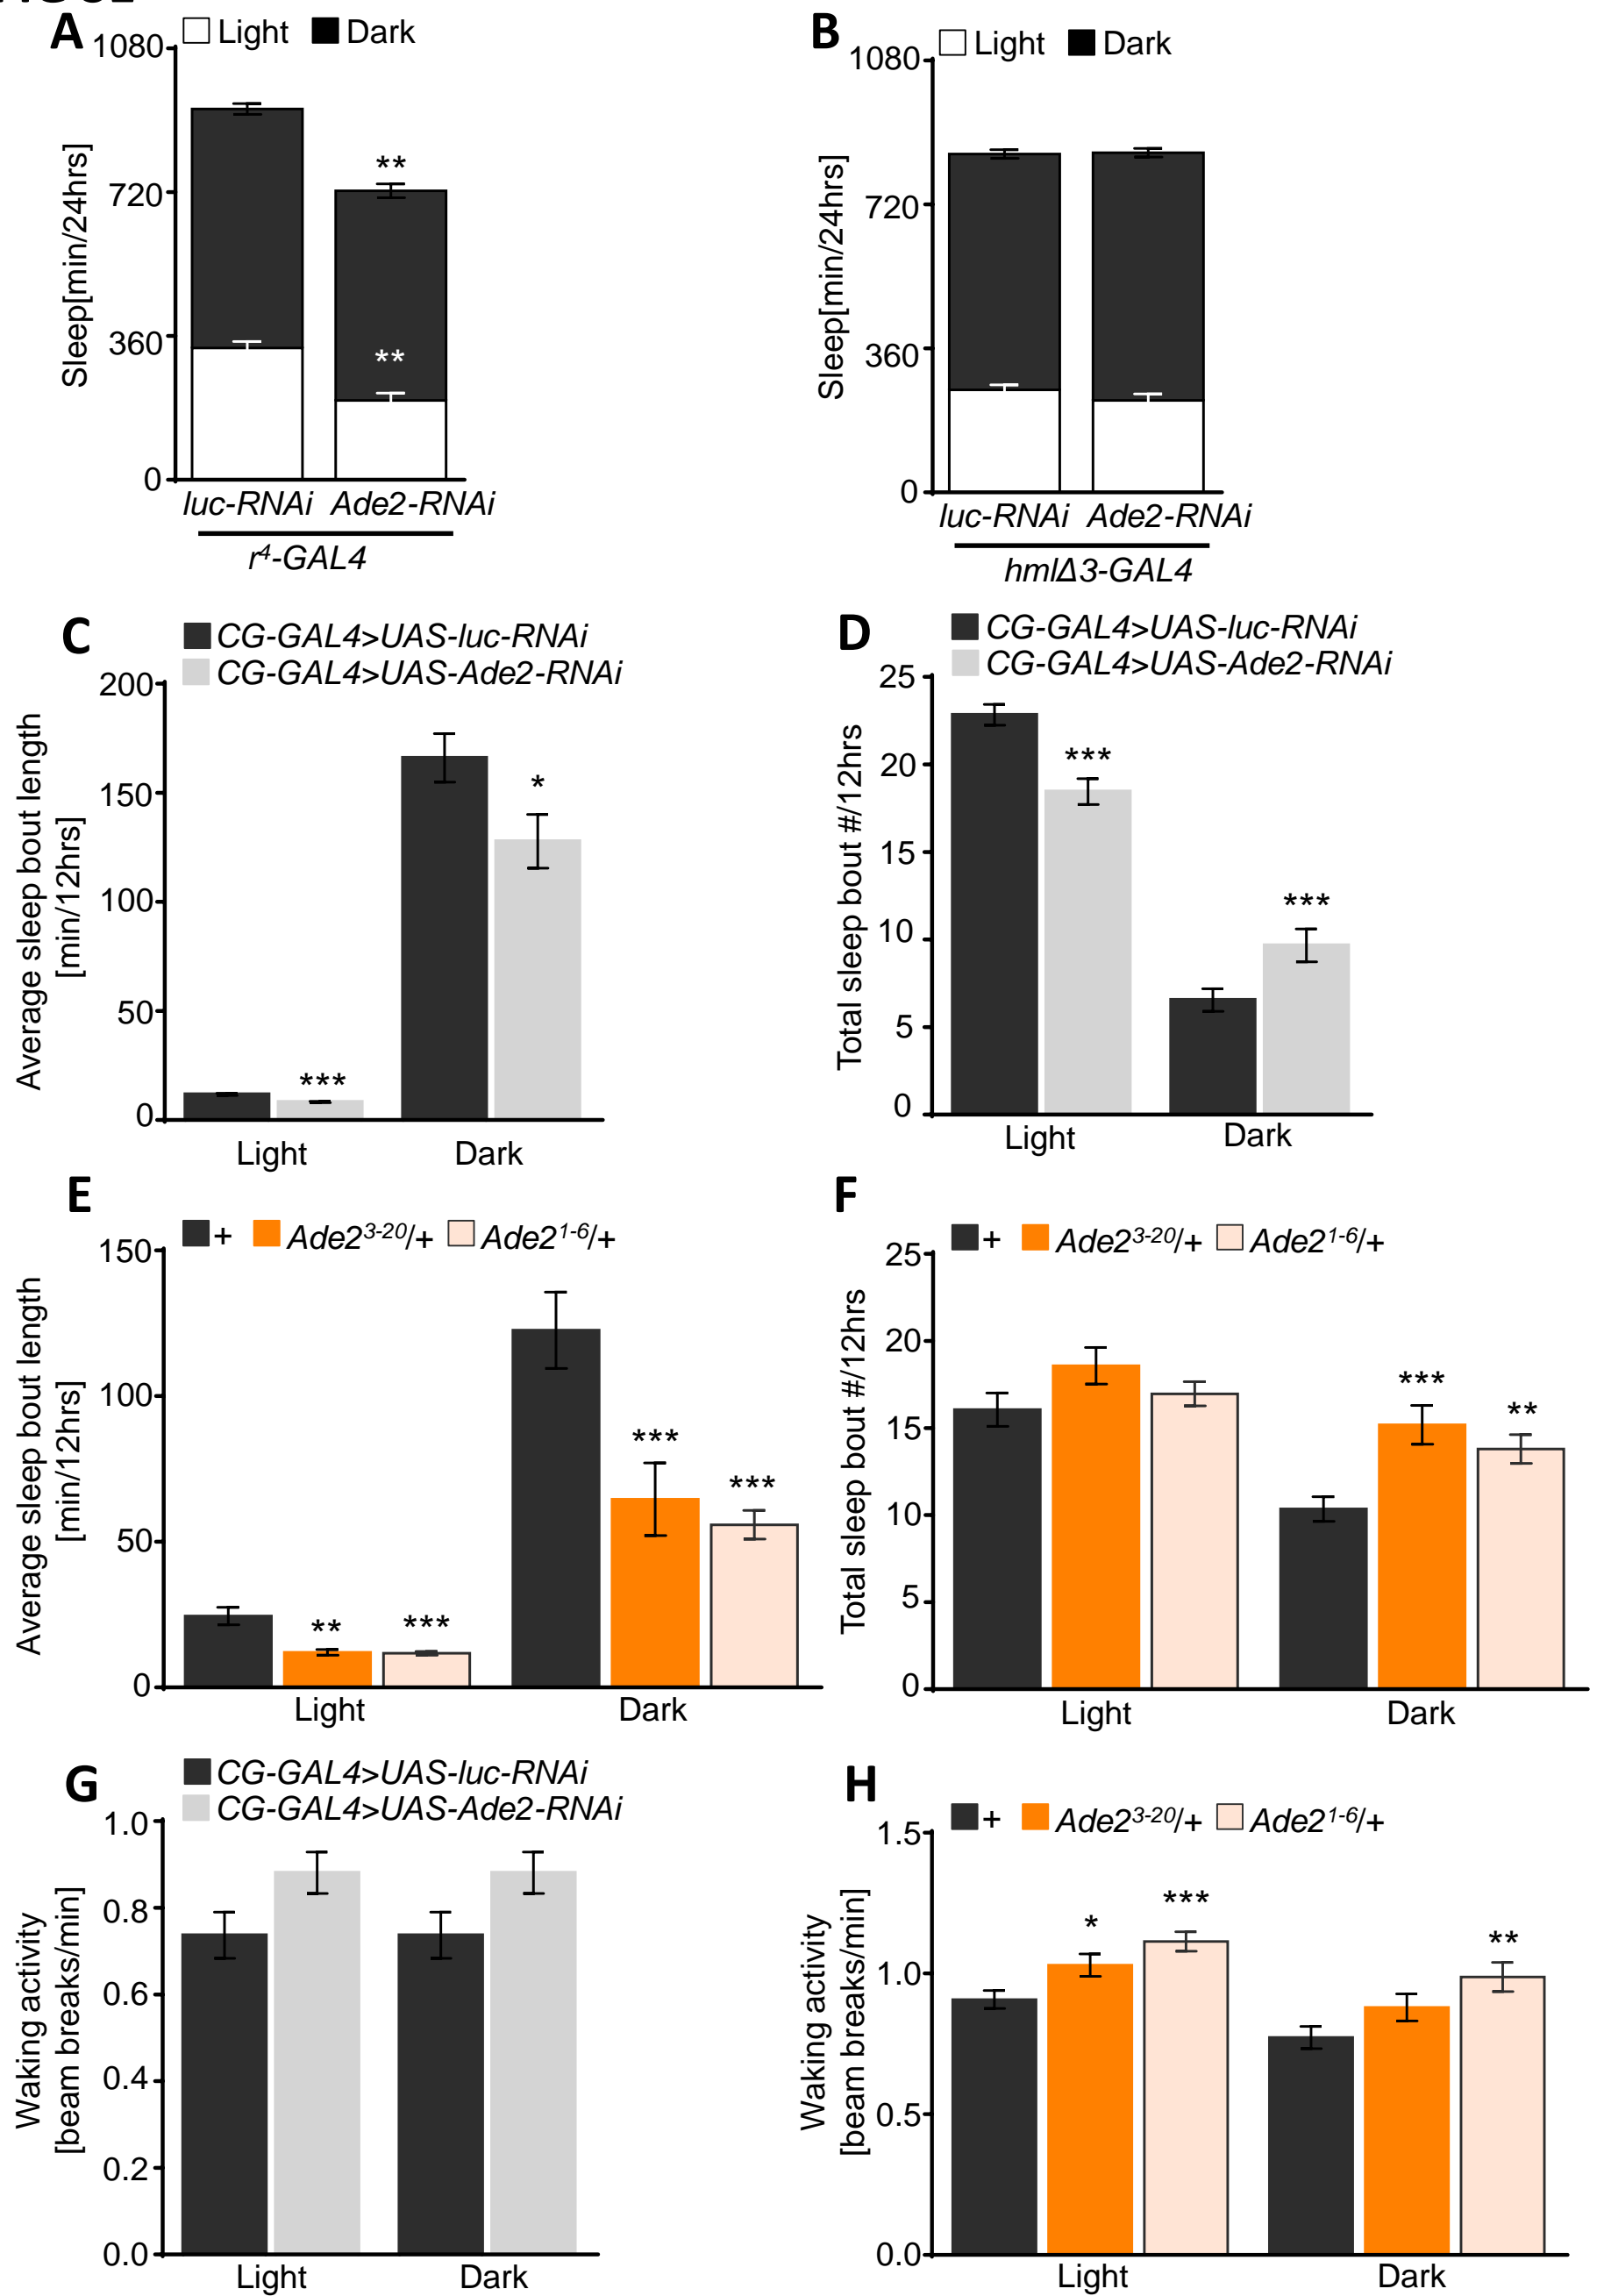

**Figure S1. Ade2 function in the fat body to promote sleep**

(A) Knock down of *Ade2* using the fat body specific driver, *r4-GAL4*, (*r4-GAL4>UAS-Ade2-RNAi*; n=45) results in a significant reduction in sleep during daytime (white;  $p=0.0021$ ,  $t=3.19$ ) and nighttime (black;  $p=0.003$ ,  $t=3.04$ ) compared to control flies (*CG-GAL4>UAS-luc-RNAi*; n=29). Unpaired t-test. (B) No differences were observed in day and night sleep when knocking down *Ade2-RNAi* in hemocytes (*hml13-GAL4*, n=31) compared to control flies (n=36,  $p=0.2$ ,  $t=1.28$ ). Unpaired t-test (C) Average bout length is significantly reduced during daytime (light;  $p<0.0001$ ,  $t=5.27$ ) and nighttime (dark,  $p=0.022$ ,  $t=2.30$ ) in *Ade2-RNAi* (n=87) flies (grey) compared to control (*CG-GAL4>UAS-luc-RNAi*; black; n=115). Unpaired t-test. (D) Knock down of *Ade2* in the fat body (grey) reduced total sleep bout during daytime ( $p<0.001$ ,  $t=4.67$ ) compared to control (black), while there is a significant increase during nighttime ( $p=0.005$ ,  $t=2.83$ ). Unpaired t-test. (E) *Ade2<sup>3-20/+</sup>* (orange; n=61) and *Ade2<sup>1-6/+</sup>* mutants (pale orange; n=85) reduced average bout length during daytime ( $p<0.0001$  for all groups) and nighttime ( $p=0.0019$  and  $p<0.0001$ ) compared to *w<sup>1118</sup>* control (black; n=111). One-way ANOVA, Light,  $F(2, 265)=11.70$ ; Dark,  $F(2, 254)=11.38$ . (F) Total sleep bout during nighttime is significantly increased in *Ade2<sup>3-20/+</sup>* (orange;  $p=0.0004$ ) and *Ade2<sup>1-6/+</sup>* mutants (pale orange;  $p=0.0074$ ) compared to *w<sup>1118</sup>* control (black). One-way ANOVA,  $F(2, 265)=8.79$ . (G) Waking activity does not differ between control flies (*CG-GAL4>UAS-luc-RNAi*; black) and *Ade2* knock down in the fat body (grey) during daytime ( $p=0.49$ ,  $t=0.68$ ) and nighttime ( $p=0.05$ ,  $t=1.94$ ). Unpaired t-test. (H) *Ade2<sup>1-6/+</sup>* mutants have increased waking activity compared to control flies (*w<sup>1118</sup>*) during daytime ( $p<0.0001$ ) and nighttime ( $p=0.0018$ ), while *Ade2<sup>3-20/+</sup>* mutants have increased waking activity only during daytime ( $p=0.047$ ). One-way ANOVA; Light,  $F(2, 265)=9.92$ ; Dark,  $F(2, 265)=6.03$ . All columns are mean  $\pm$  SEM; \* $p<0.05$ ; \*\* $p<0.01$ ; \*\*\* $p<0.001$ .
